# Supplementary material for: A Community EcoHealth Index from EnviroAtlas Ecosystem Services Metrics
Source: MDPI journal article supplement (doi:10.3390/ijerph16152760), 2019-08-02
Supplement: s1 [file s1]

## Supplementary Figures:

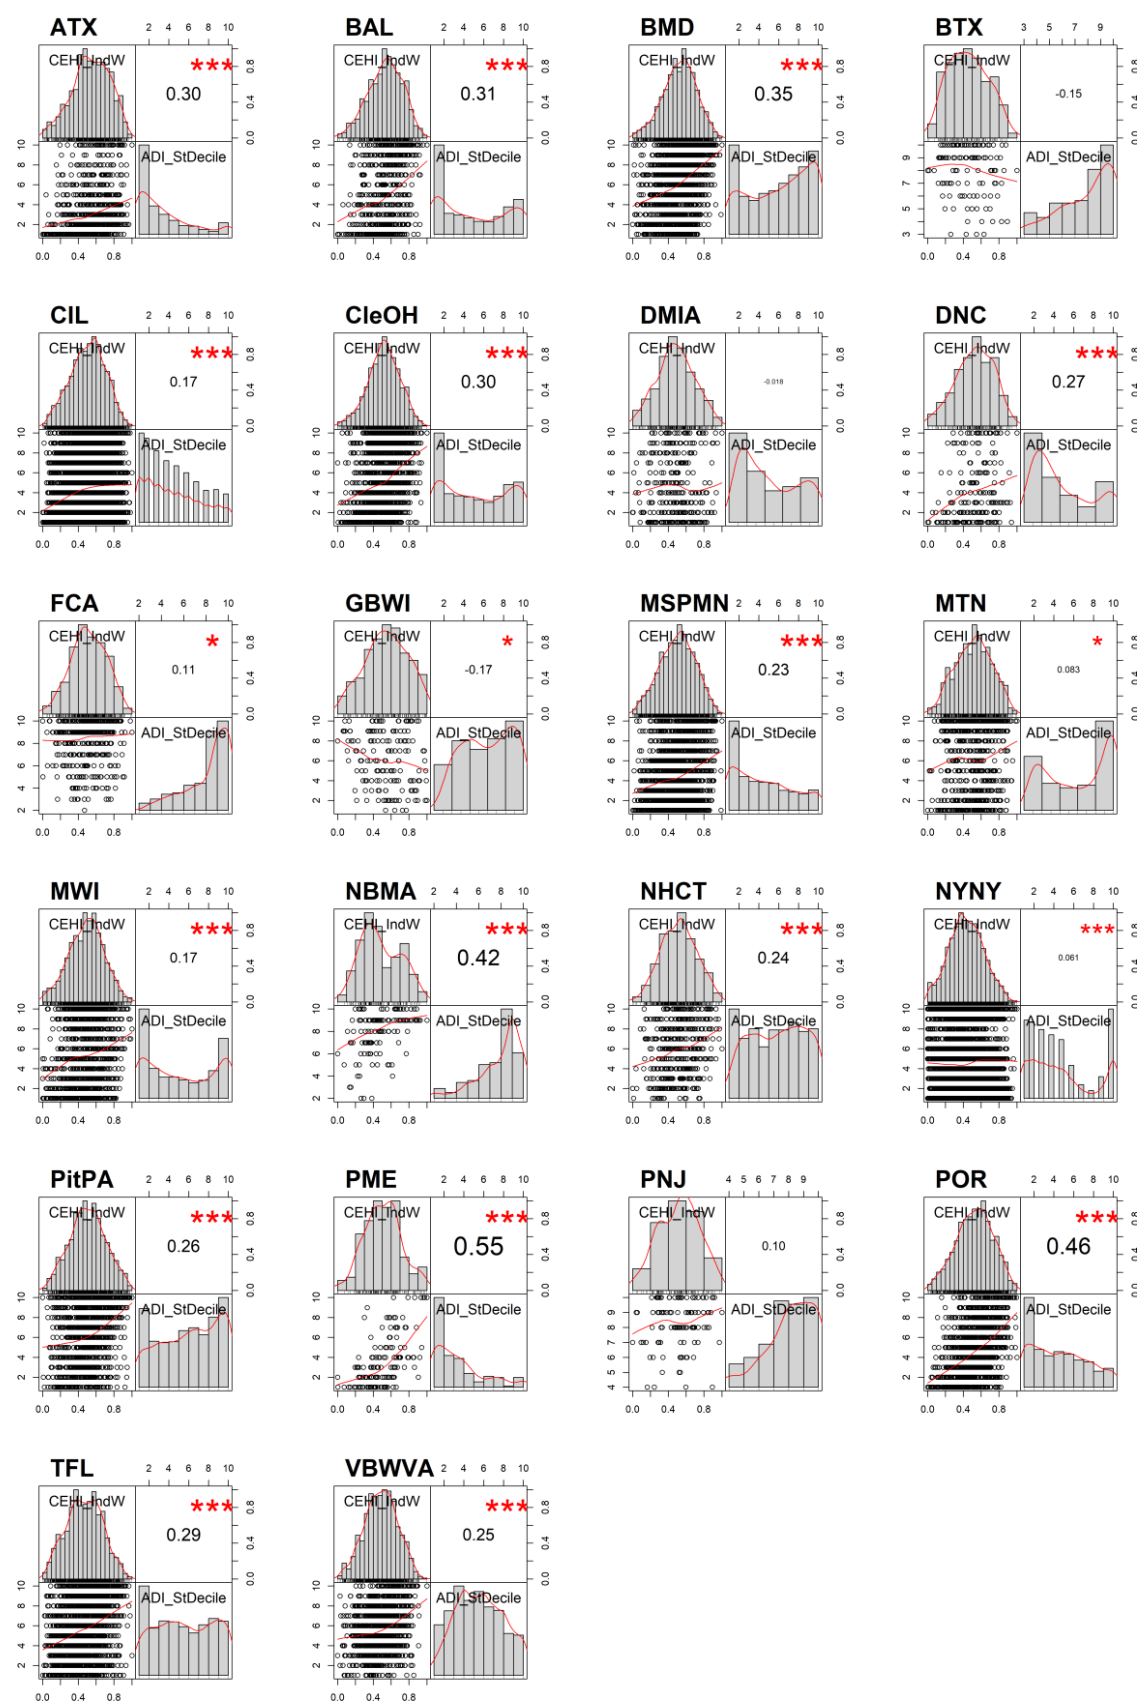

**Figure S1.** Spearman correlations of CEHI<sub>IndW</sub> and ADI State-Only Deciles for all 22 EnviroAtlas featured communities. In Figures S1-S4, the chart.Correlation plots from the R library PerformanceAnalytics show

distributions of each variable on the diagonal, the bivariate scatter plots with a fitted line (bottom left), and the value of the correlation plus the significance level in red (top right). Each significance level is associated with a symbol as follows: p-values ( $< 0.001$ ,  $< 0.01$ ,  $< 0.05$ ,  $< 0.1$ )  $\Rightarrow$  symbols (\*\*\*, \*\*, \*, .).

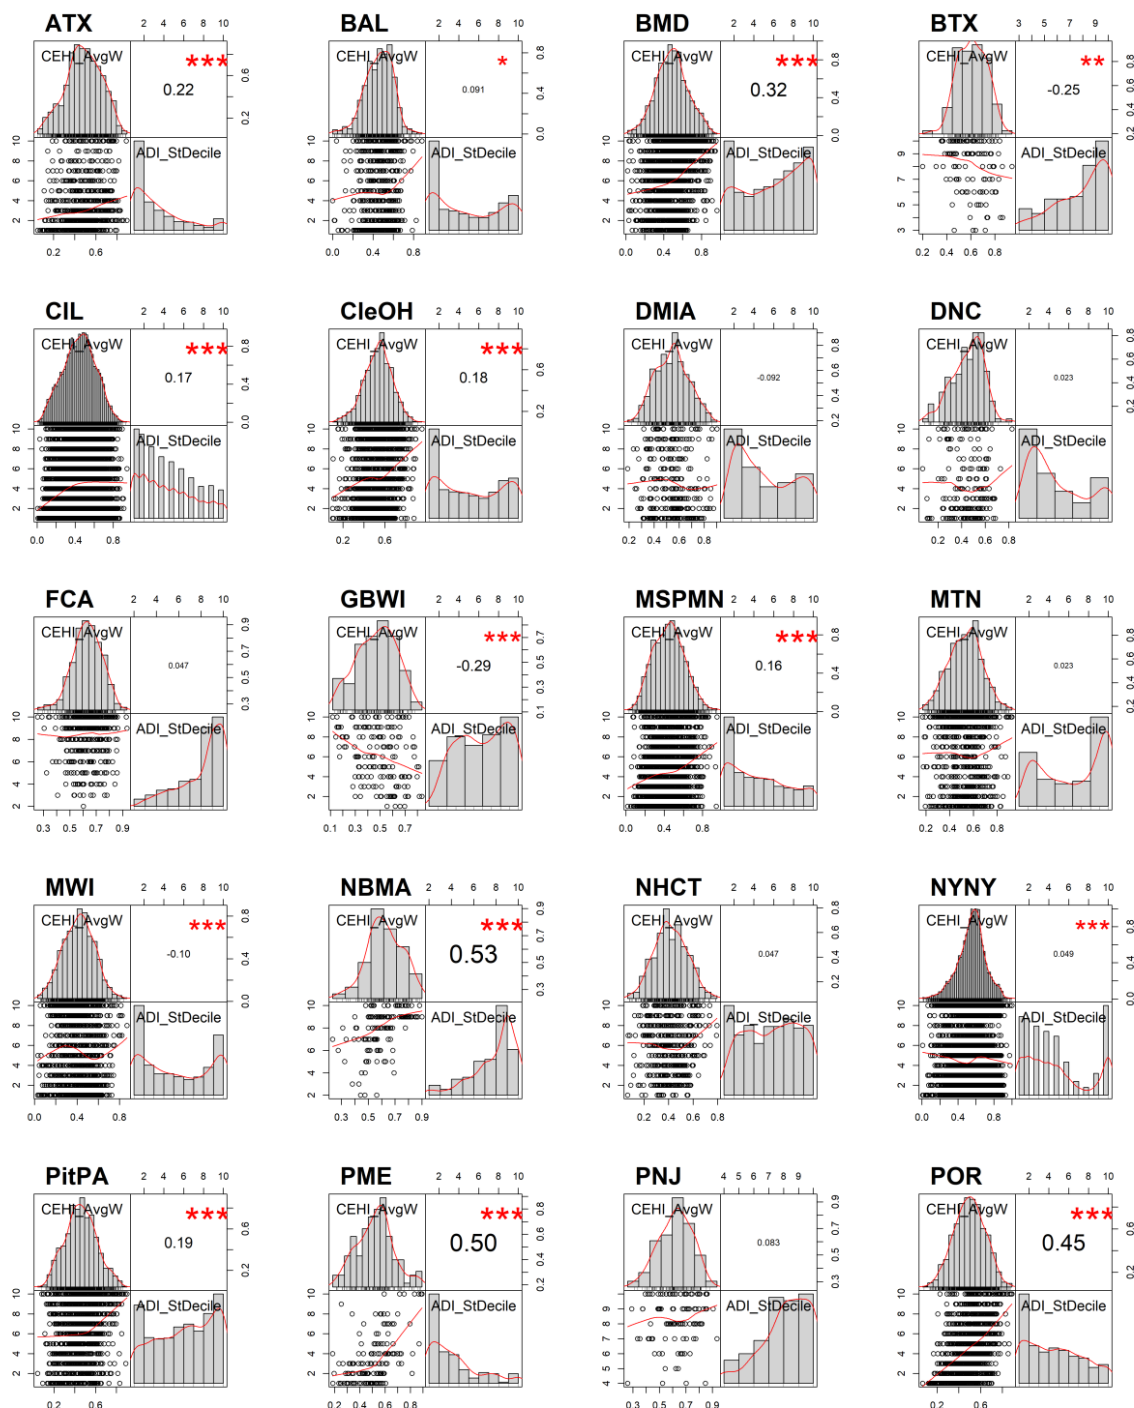

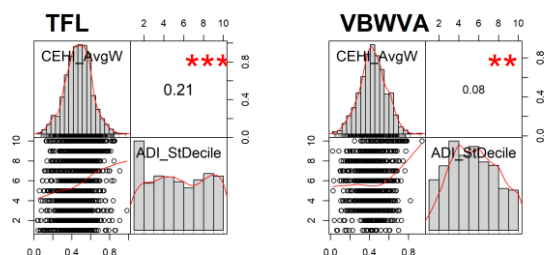

**Figure S2.** Spearman correlations of CEHIAvgW and ADI State-Only Deciles for all 22 EnviroAtlas featured communities.

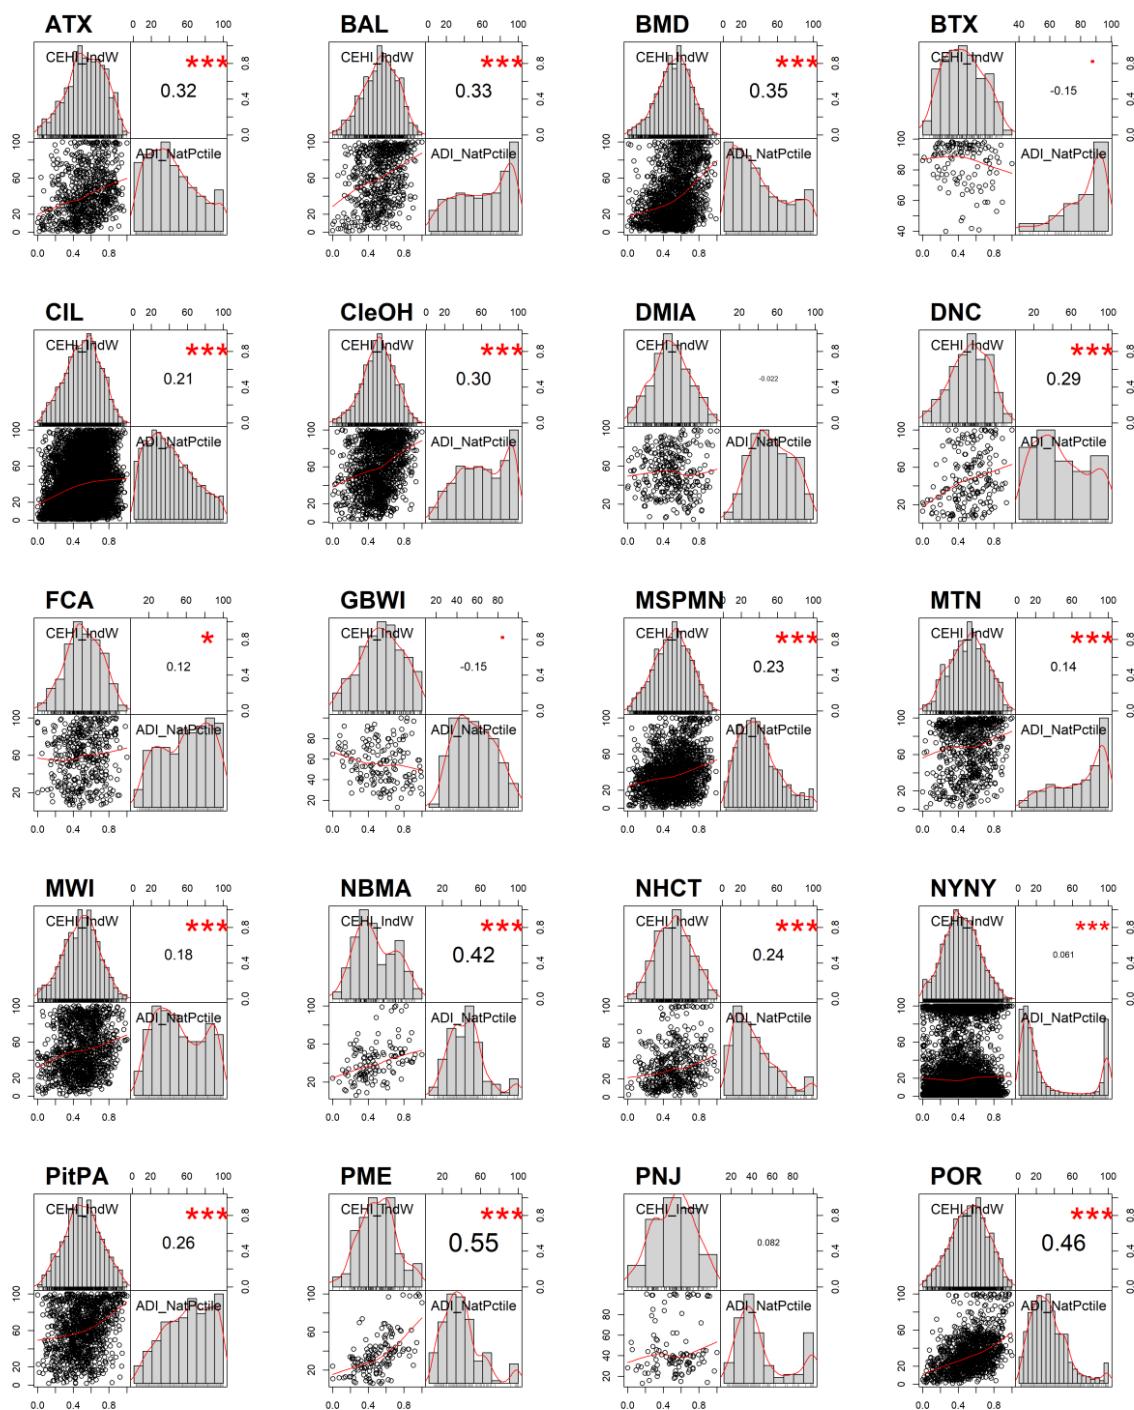

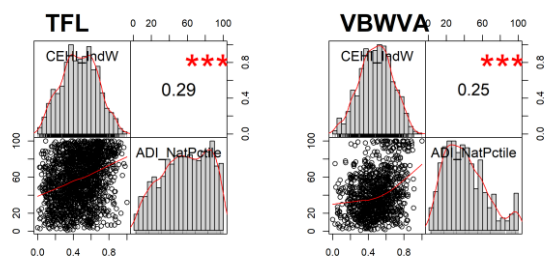

**Figure S3.** Spearman correlations of CEHI<sub>IndW</sub> and ADI National Percentiles for all 22 EnviroAtlas featured communities.

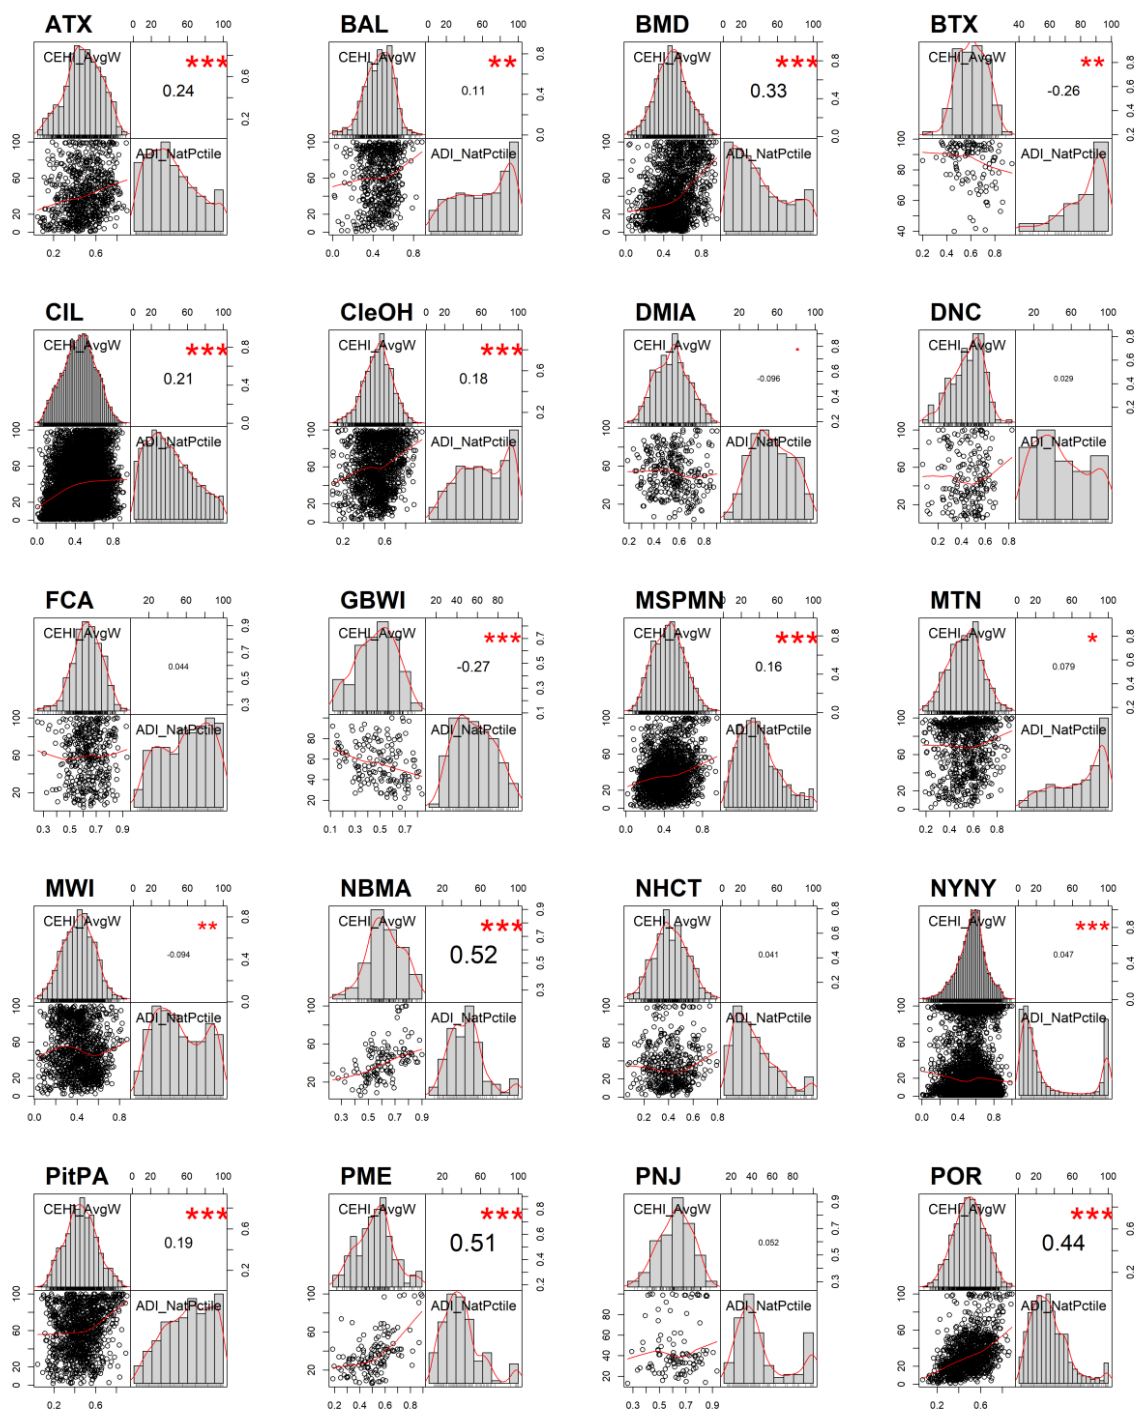

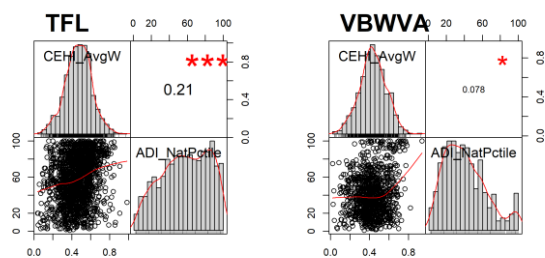

**Figure S4.** Spearman correlations of CEHIAvgW and ADI National Percentiles for all 22 EnviroAtlas featured communities.
